# Supplementary material for: Relevance of DNA repair gene polymorphisms to gastric cancer risk and phenotype
Source: PubMed Central journal article supplement (PMC5482622; doi:10.18632/oncotarget.16261), 2017-03-16
Supplement: oncotarget-08-35848-s001.pdf [file oncotarget-08-35848-s001.pdf]

## Relevance of DNA repair gene polymorphisms to gastric cancer risk and phenotype

### Supplementary Materials

**Supplementary Table 1: Demographic and clinical characteristics of HCs and GC patients according to the location and histological type of tumor**

|                      | Healthy Controls<br><i>n</i> = 603 | Cardia GC<br><i>n</i> = 117     | ORs (95% CI)     | <i>P</i> Value     | Non-Cardia GC<br><i>n</i> = 486 | ORs (95% CI)     | <i>P</i> Value     |
|----------------------|------------------------------------|---------------------------------|------------------|--------------------|---------------------------------|------------------|--------------------|
| Age yrs ± SD (range) | 70.17 ± 12.32<br>(30–96)           | 69 ± 11.06<br>(30–91)           | 0.99 (0.98–1.01) | 0.67               | 70.59 ± 12.55<br>(30–96)        | 1 (0.99–1.01)    | 0.69               |
| Gender               | 413 M (68.5%)<br>190 F (31.5%)     | 102 M (87.2%)<br>15 F (12.8%)   | 3.15 (1.78–5.57) | <b>&lt; 0.0001</b> | 311 M (64%)<br>175 F (36%)      | 0.83 (0.64–1.07) | 0.14               |
| Cigarette smoking    |                                    |                                 |                  |                    |                                 |                  |                    |
| Never                | 311/585 (53.2%)                    | 33/114 (28.9%)                  | Reference        |                    | 258/468 (55.1%)                 | Reference        |                    |
| Former               | 184/585 (31.4%)                    | 53/114 (46.5%)                  | 2.71 (1.69–4.35) | <b>&lt; 0.0001</b> | 101/468 (21.6%)                 | 0.71 (0.53–0.95) | <b>0.02</b>        |
| Current smoker       | 90/585 (15.4%)                     | 28/114 (24.6%)                  | 2.93 (1.68–5.11) | <b>0.0002</b>      | 109/468 (23.3%)                 | 1.35 (0.97–1.88) | 0.07               |
| <i>H. pylori</i> +   | 364 (60.4%)                        | 67/109 (61.5%)                  | 1.01 (0.72–1.44) | 0.93               | 310/447 (69.3%)                 | 1.49 (1.15–1.94) | <b>0.002</b>       |
| CagA+                | 253 (41.9%)                        | 45/109 (41.3%)                  | 0.97 (0.68–1.32) | 0.96               | 280/447 (62.6%)                 | 2.32 (1.80–2.98) | <b>&lt; 0.0001</b> |
| VacA+                | 237 (39.3%)                        | 38/109 (34.9%)                  | 0.82 (0.54–1.27) | 0.39               | 185/447 (41.4%)                 | 1.09 (0.85–1.40) | 0.49               |
| Family history of GC | 33/539 (6.1%)                      | 12/104 (11.5%)                  | 1.42 (0.68–3.01) | 0.42               | 76/430 (17.7%)                  | 3.29 (2.14–5.06) | <b>&lt; 0.0001</b> |
|                      | Healthy Controls<br><i>n</i> = 603 | Intestinal GC<br><i>n</i> = 250 | ORs (95% CI)     | <i>P</i> Value     | Diffuse GC<br><i>n</i> = 178    | ORs (95% CI)     | <i>P</i> Value     |
| Age yrs ± SD (range) | 70.17 ± 12.32<br>(30–96)           | 72.82 ± 10.73<br>(33–92)        | 1.02 (1.01–1.03) | <b>0.004</b>       | 67.34 ± 14.32<br>(30–96)        | 0.98 (0.98–0.99) | <b>0.005</b>       |
| Gender               | 413 M (68.5%)<br>190 F (31.5%)     | 167 M (66.8%)<br>83 F (33.2%)   | 0.98 (0.72–1.36) | 0.94               | 101 M (56.7%)<br>77 F (43.3%)   | 0.58 (0.41–0.82) | 0.002              |
| Cigarette smoking    |                                    |                                 |                  |                    |                                 |                  |                    |
| Never                | 311/585 (53.2%)                    | 134/240 (55.8%)                 | Reference        |                    | 102/171 (59.6%)                 | Reference        |                    |
| Former               | 184/585 (31.4%)                    | 65/240 (27.1%)                  | 0.82 (0.58–1.16) | 0.29               | 40/171 (23.4%)                  | 0.66 (0.44–1.00) | 0.06               |
| Current smoker       | 90/585 (15.4%)                     | 41/240 (17.1%)                  | 1.06 (0.69–1.61) | 0.83               | 29/171 (17%)                    | 0.98 (0.61–1.58) | 1                  |
| <i>H. pylori</i> +   | 364 (60.4%)                        | 158/231 (68.4%)                 | 1.47 (1.06–2.03) | <b>0.02</b>        | 123/159 (77.3%)                 | 2.17 (1.44–3.26) | <b>&lt; 0.0001</b> |
| CagA+                | 253 (41.9%)                        | 143/231 (61.9%)                 | 2.25 (1.65–3.07) | <b>&lt; 0.0001</b> | 109/159 (68.5%)                 | 3.02 (2.08–4.37) | <b>&lt; 0.0001</b> |
| VacA+                | 237 (39.3%)                        | 100/231 (43.3%)                 | 1.21 (0.88–1.64) | 0.23               | 68/159 (42.8%)                  | 1.11 (0.78–1.59) | 0.56               |
| Family history of GC | 33/539 (6.1%)                      | 42/222 (18.9%)                  | 3.58 (2.20–5.82) | <b>&lt; 0.0001</b> | 23/159 (14.5%)                  | 2.60 (1.47–4.56) | <b>0.001</b>       |

HCs, healthy controls; GC, gastric cancer; n, number of individuals; OR, odds ratio; CI, confidence interval; SD, standard deviation; M, male; F, female. OR and 95% CI values adjusted by sex and age. *P* values < 0.05 are highlighted in bold.

**Supplementary Table 2: Genotype frequencies of DNA repair gene polymorphisms in gastric cancer patients and healthy controls.** See Supplementary\_Table\_2

**Supplementary Table 3: Significant SNPs in DNA repair genes associated with gastric cancer risk.** See Supplementary\_Table\_3

**Supplementary Table 4: Association of DNA repair gene polymorphisms with risk of *Helicobacter pylori* infection in healthy controls.** See Supplementary\_Table\_4

**Supplementary Table 5: Significant SNPs associated with gastric cancer risk.** Association analysis stratified by anatomical location of the tumor. See Supplementary\_Table\_5

**Supplementary Table 6: Significant SNPs associated with gastric cancer risk.** Association analysis stratified by histological tumor type. See Supplementary\_Table\_6

**Supplementary Table 7: Association of DNA repair gene polymorphisms with GC risk.** Stratified analysis by age. See Supplementary\_Table\_7

**Supplementary Table 8: Association of DNA repair polymorphisms with gastric cancer risk.** Stratified analysis by gender. See Supplementary\_Table\_8

**Supplementary Table 9: Association of DNA repair gene polymorphisms with gastric cancer risk.** Stratified analysis by smoking status (never smokers / current smokers). See Supplementary\_Table\_9

**Supplementary Table 10: Association of DNA repair gene polymorphisms with gastric cancer risk.** Stratified analysis by family history of gastric cancer. See Supplementary\_Table\_10

**Supplementary Table 11: Haplotypes in DNA repair genes and association with GC risk.**  
See Supplementary\_Table\_11

**Supplementary Table 12: Characteristics of candidate SNPs analyzed in the study.**  
See Supplementary\_Table\_12
